# Supplementary material for: Integrated photocatalytic micropillar nanoreactor electrospray ionization chip for mimicking phase I metabolic reactions
Source: Royal Society of Chemistry journal article supplement (doi:10.1039/c0lc00689k), 2011-01-01
Supplement: c0lc00689k.pdf [file c0lc00689k.pdf]

## Supporting information:

### Integrated photocatalytic micropillar nanoreactor electrospray ionization microchip for mimicking phase I metabolic reactions

Teemu Nissilä, Lauri Sainiemi, Mika-Matti Karikko, Marianna Kemell, Mikko Ritala, Sami Franssila, Risto Kostainen and Raimo A. Ketola\*

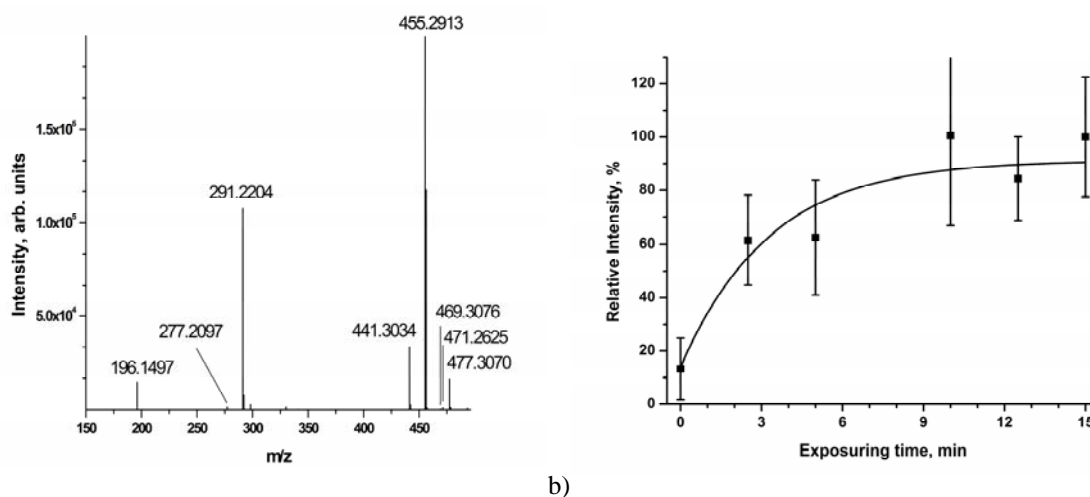

Figure S1: a) Mass spectrum of verapamil reaction products formed with TiO<sub>2</sub>-nanoreactor- $\mu$ PESI-chip. b) Relative intensity of verapamil reaction products versus a protonated verapamil ion as a function of UV-exposing time.

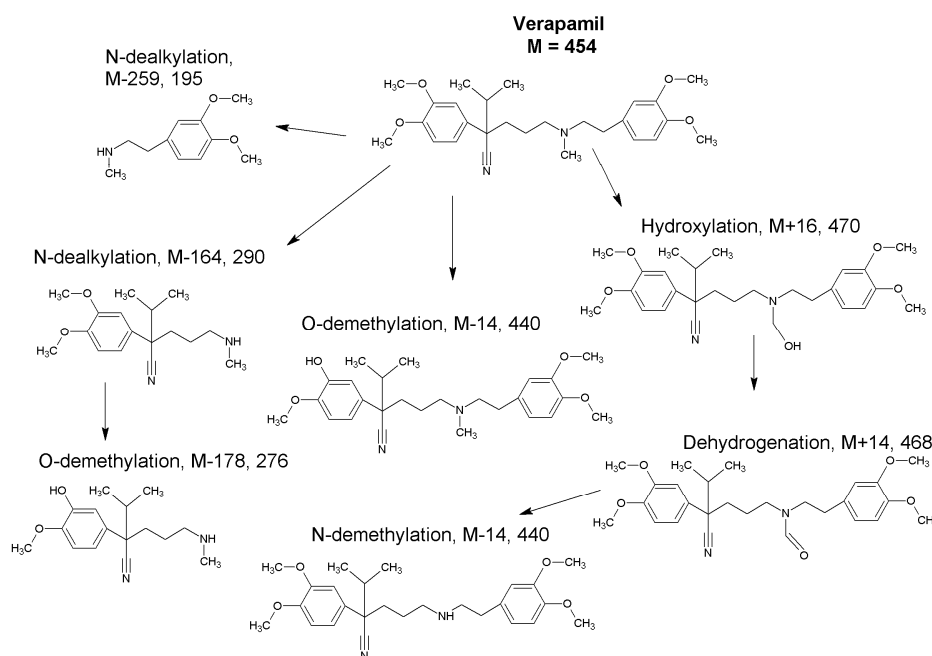

Figure S2. Verapamil and reaction products produced with TiO<sub>2</sub>-nanoreactor- $\mu$ PESI method. Arrows shows the suggested verapamil metabolism pathway.

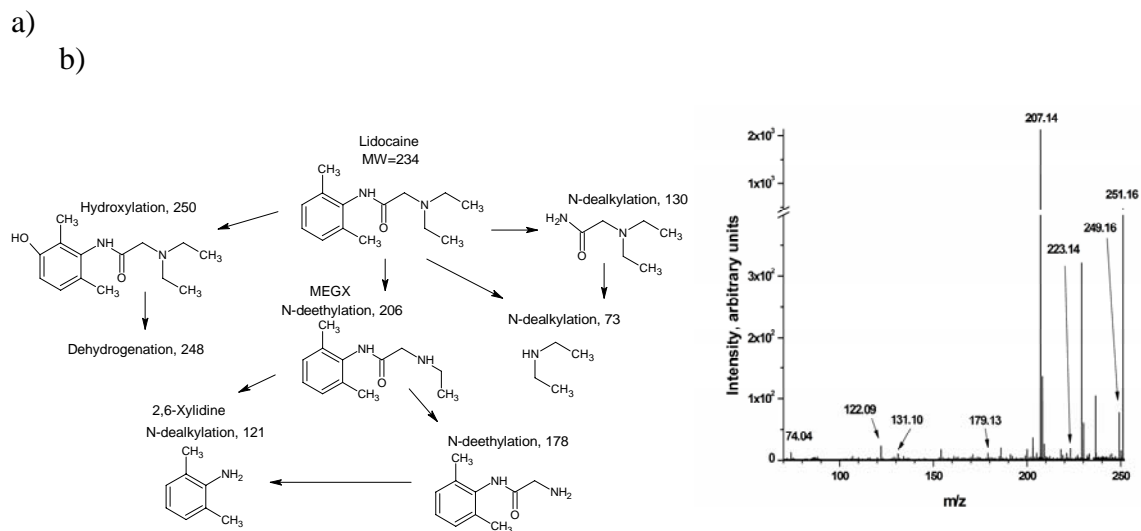

Figure S3. a) A mass spectrum of lidocaine reaction products analyzed with  $\text{TiO}_2$ -nanoreactor- $\mu\text{PESI-MS}$ . b) Suggested metabolism pathway of lidocaine.

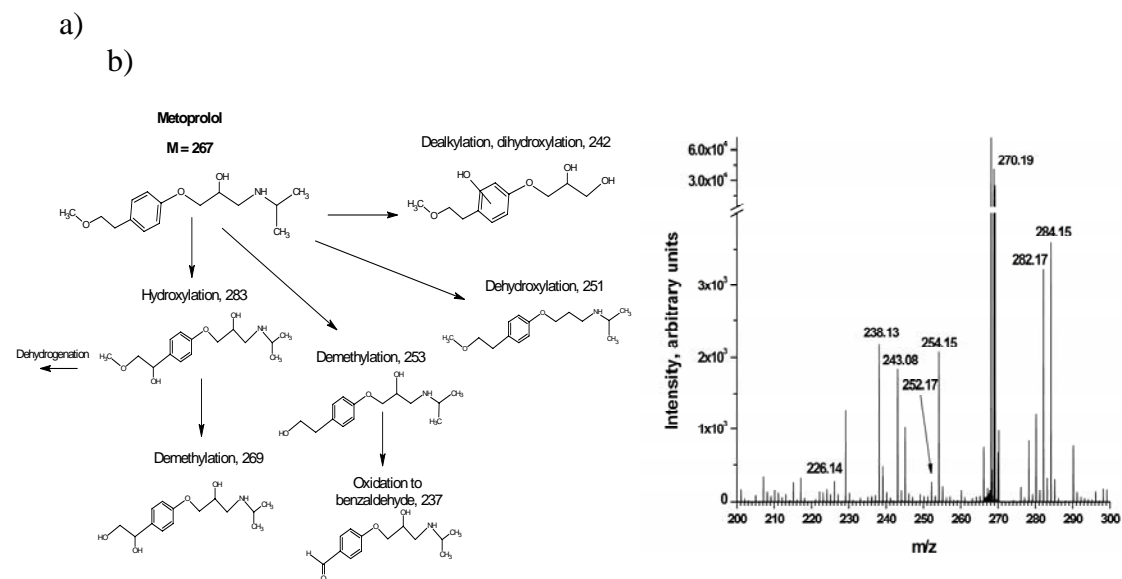

Figure S4. a) A suggested metabolism pathway of metoprolol. b) A mass spectrum of metoprolol reaction products analyzed with  $\text{TiO}_2$  nanoreactor- $\mu\text{PESI-MS}$ .

a)

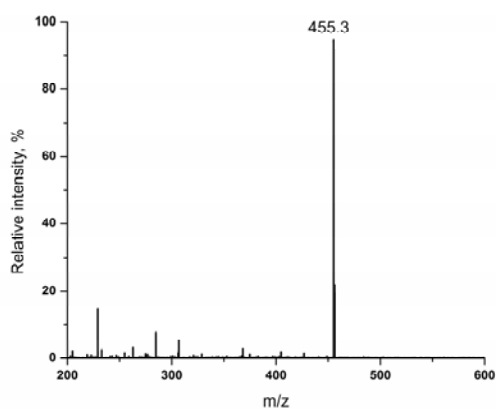

b)

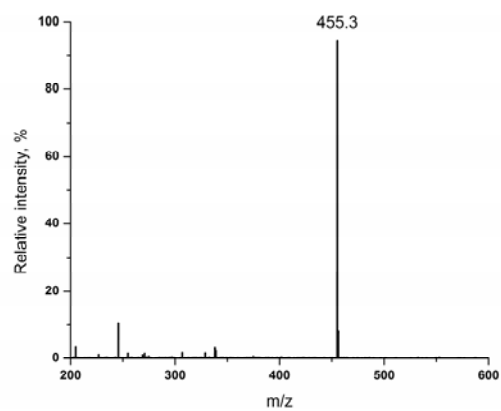

Figure S5. a) A mass spectrum of verapamil, measured after keeping it for 15 min on an uncoated silicon  $\mu$ PESI microchip (containing a native  $\text{SiO}_2$ -nanolayer) and b) a mass spectrum of verapamil and its possible reaction products formed within 15 min UV illumination on the uncoated silicon  $\mu$ PESI microchip.
